# Supplementary material for: Real-world integration of genomic data into the electronic health record: the PennChart Genomics Initiative
Source: PubMed Central journal article supplement (PMC8026392; doi:10.1038/s41436-020-01056-y), 2020-12-10
Supplement: 41436_2020_1056_MOESM1_ESM.pdf [file 41436_2020_1056_MOESM1_ESM.pdf]

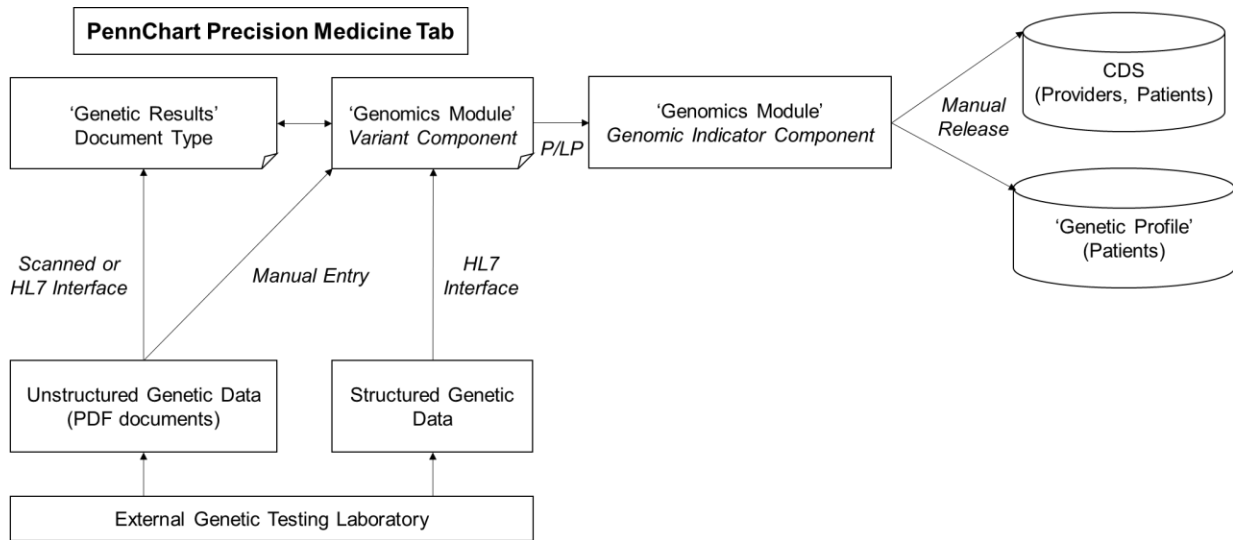

**Supplemental Figure 1.** Integration of genomic data into PennChart, the electronic health record system at Penn Medicine. HL7 = Health Level 7. P/LP = pathogenic/likely pathogenic variant. CDS = clinical decision support.
